# Supplementary material for: Thermodynamics of coal chars; correlation of heat capacity with composition and pyrolysis conditions
Source: MDPI journal article supplement (doi:10.3390/pharmaceutics15020527), 1983-01-01
Supplement: s1 [file s1]

# FURTHER INSIGHTS IN THE DESIGN OF POTENT UROPATHOGENIC *E. COLI* FIMH ANTAGONISTS

Leila Mousavifar<sup>1</sup>, Meysam Sarshar<sup>2</sup>, Clarisse Bridot<sup>3</sup>, Daniela Scribano<sup>4</sup>, Cecilia Ambrosi<sup>5,6</sup>, Anna Teresa Palamara<sup>4,7</sup>, Gerard Vergoten<sup>8</sup>, Benoît Roubinet<sup>9</sup>, Ludovic Landemarre<sup>9</sup>, Julie Bouckaert<sup>3\*</sup>, René Roy<sup>1\*</sup>

<sup>1</sup> Glycosciences and Nanomaterial Laboratory, Université du Québec à Montréal, P.O. Box 8888, Succ. Centre-Ville, Montréal, Québec H3C 3P8, Canada

<sup>2</sup> Research Laboratories, Bambino Gesù Children's Hospital, IRCCS, 00146 Rome, Italy

<sup>3</sup> Unité de Glycobiologie Structurale et Fonctionnelle (UGSF), UMR8576 du CNRS, Univ. Lille, F- 59000, Lille, France

<sup>4</sup> Department of Public Health and Infectious Diseases, Sapienza University of Rome, 00185 Rome, Italy

<sup>5</sup> Department of Human Sciences and Promotion of the Quality of Life, San Raffaele Roma Open University, 00166 Rome, Italy

<sup>6</sup> IRCCS San Raffaele Roma, Rome, Italy

<sup>7</sup> Department of Infectious Diseases, National Institute of Health, 00161 Rome, Italy

<sup>8</sup> University of Lille, Institut de Chimie Pharmaceutique Albert Lespagnol (ICPAL), Faculté de Pharmacie, 3 rue du Professeur Laguesse, BP-83, F-59006, Lille, France

<sup>9</sup> GLYcoDiag, 2 rue du Cristal, 45100 Orléans, France

\* Correspondence: roy.rene@uqam.ca ; julie.bouckaert@univ-lille.fr

## Materials and Methods

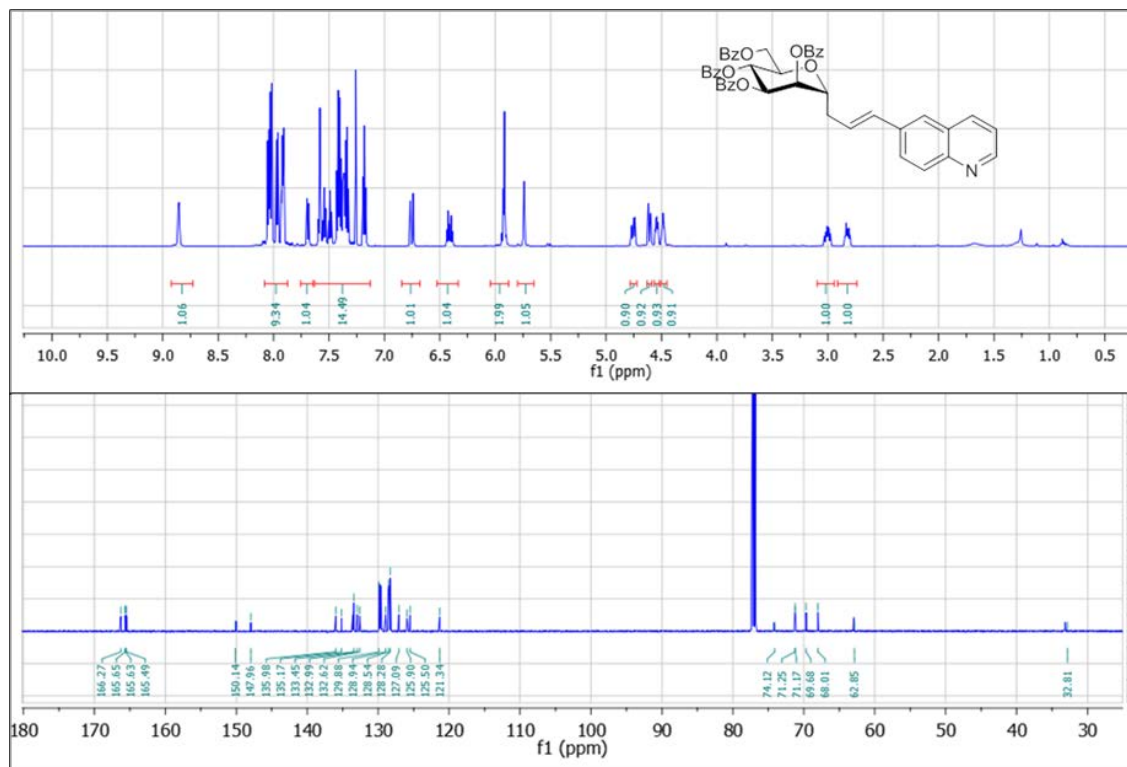

Figure S1. <sup>1</sup>H NMR and <sup>13</sup>C NMR of compound 2 (CDCl<sub>3</sub>, 600 and 151 MHz, respectively)

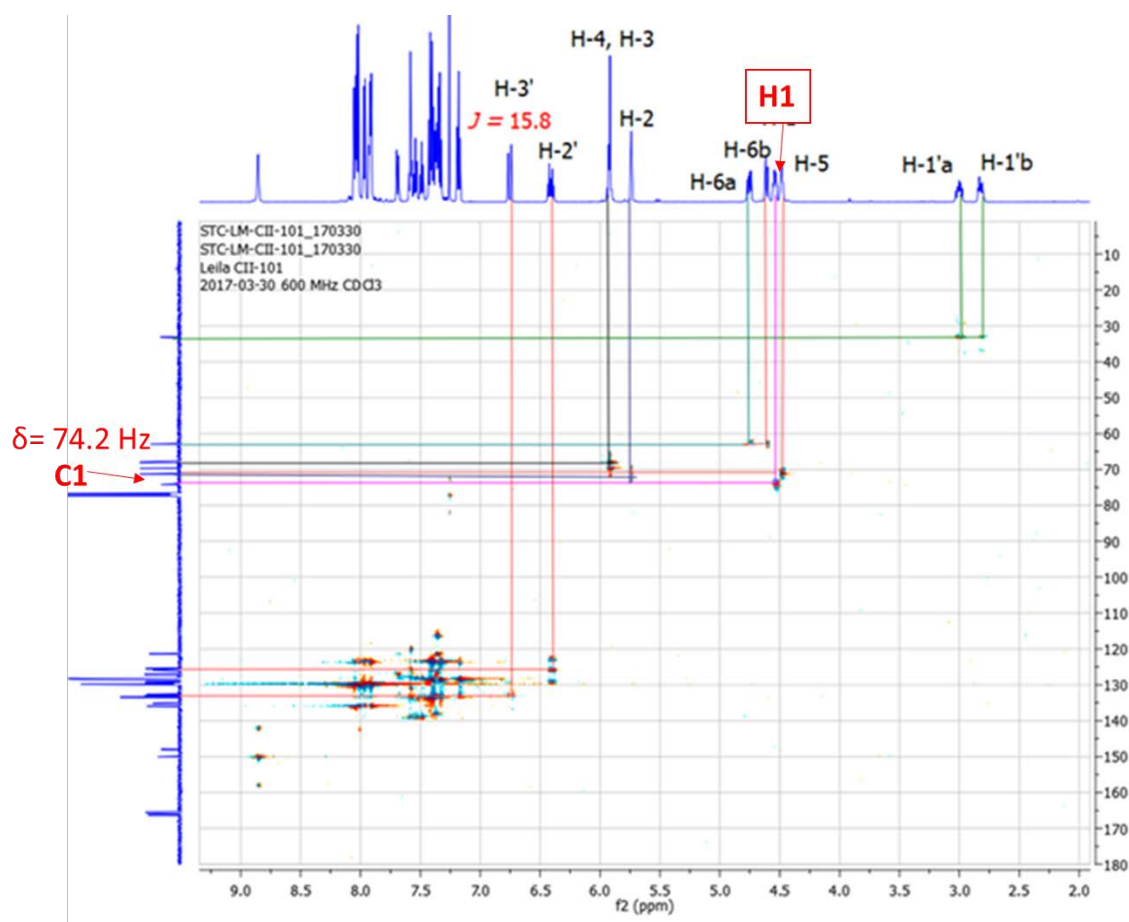

**Figure S2.** HSQC of purified compound 2. The coupling constant of H-3' ( $J_{2',3'}=15.8$  Hz) indicates the presence of the trans stereoisomer. ( $\text{CDCl}_3$ , 600 MHz)

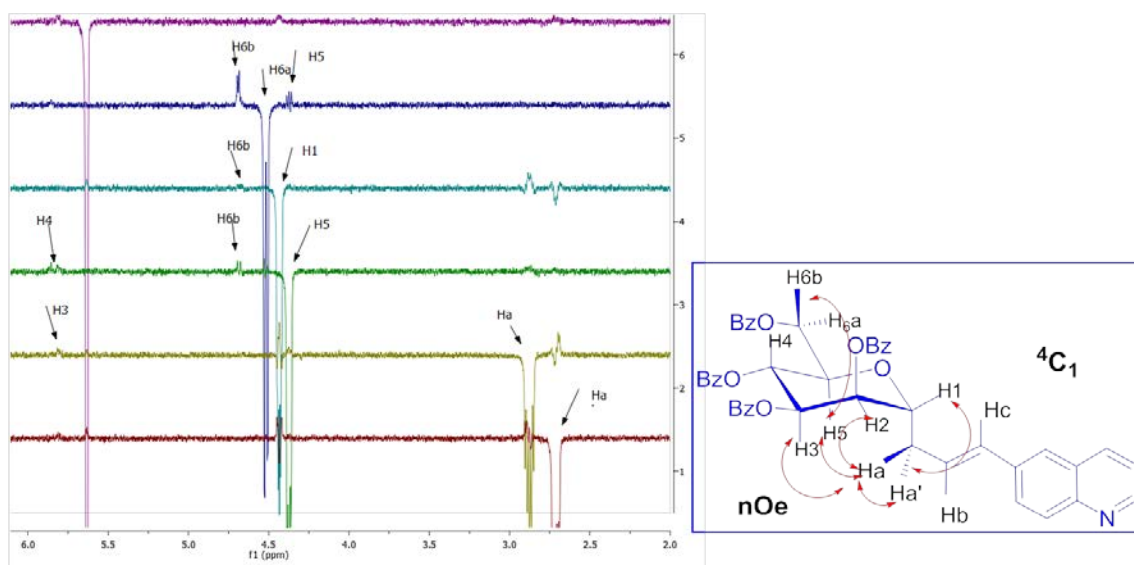

**Figure S3.** Conformational studies of compound 2 in solution using NOESY technique 600 MHz.

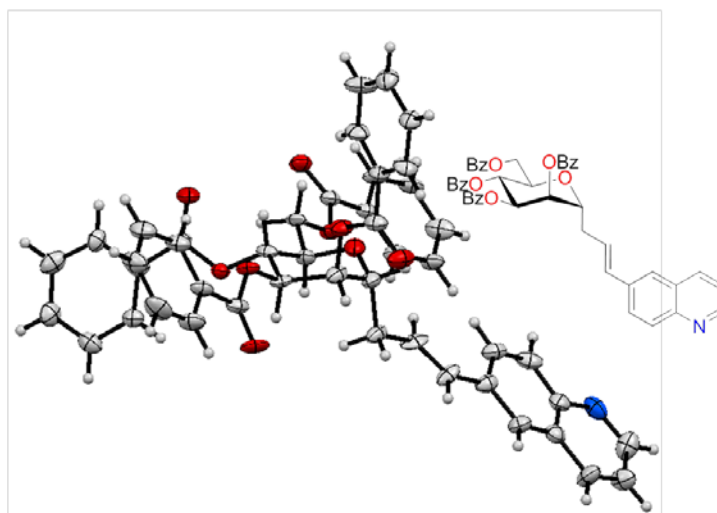

**Figure S4.** The ORTEP diagram of compound 2 clearly shows it to exist as the proper chair conformer *4C1*. X-Ray crystal-structure and refinement data: formula, ( $C_{46}H_{37}NO_9$ ), monoclinic, space group P21,  $a = 24.6459$  (12) Å,  $b = 6.3450$  (3) Å,  $c = 25.5657$  (12) Å,  $\beta = 108.871(2)^\circ$ ,  $90^\circ$ ,  $V = 3783.0(3)$  Å<sup>3</sup>,  $Z = 4$ ,  $T = 150$  K,  $D_{\text{calcd}} = 1.313$  g/cm<sup>3</sup>. Crystallographic data for the structure reported in this paper has been deposited at the Cambridge Crystallographic Data Centre (CCDC) with deposition no: (CCDC:1560371). Supplementary data can be obtained free of charge from CCDC, 12 Union Road, Cambridge CB2 1EZ,

UK (fax: (+44)1223-336-033; e-mail: deposit@ccdc.cam.ac.uk)

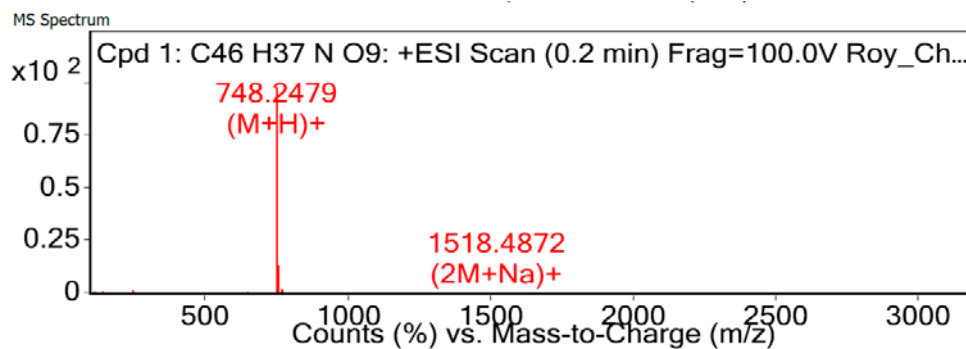

**Figure S5.** ESI+-HRMS spectrum of compound 2

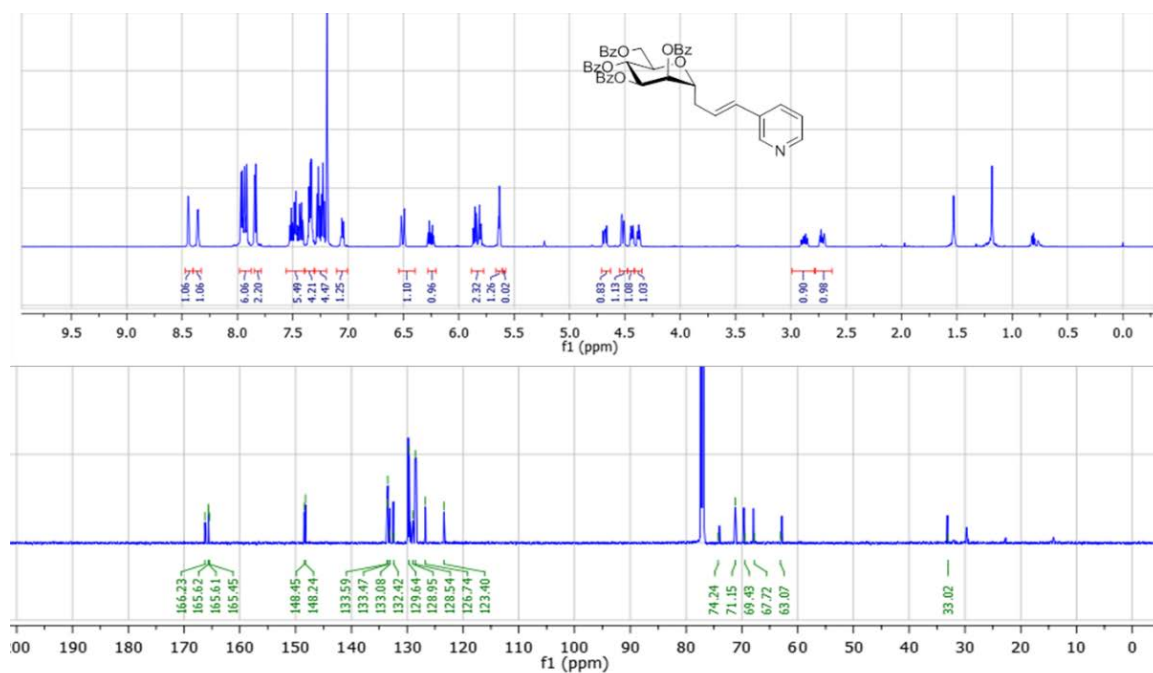

**Figure S6.** <sup>1</sup>H NMR and <sup>13</sup>C NMR of compound 3 (CDCl<sub>3</sub>, 600 and 151 MHz, respectively)

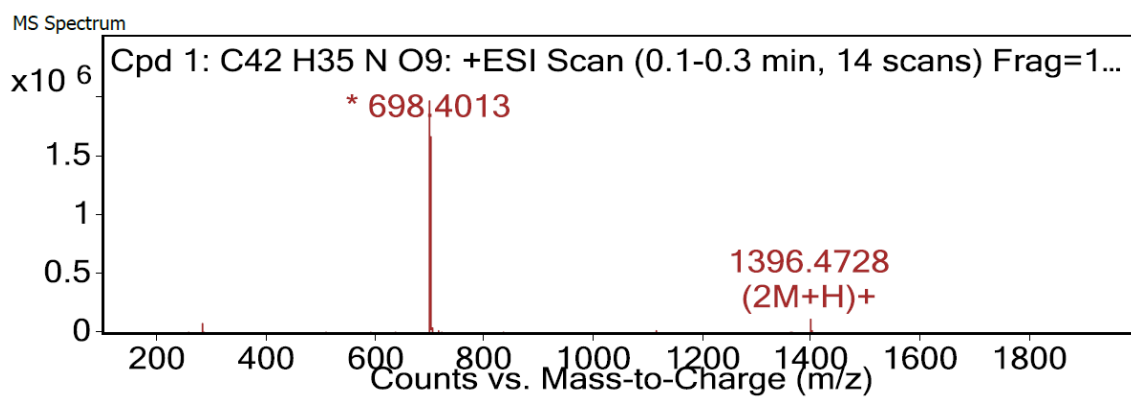

**Figure S7.** ESI<sup>+</sup>-HRMS spectrum of compound 3

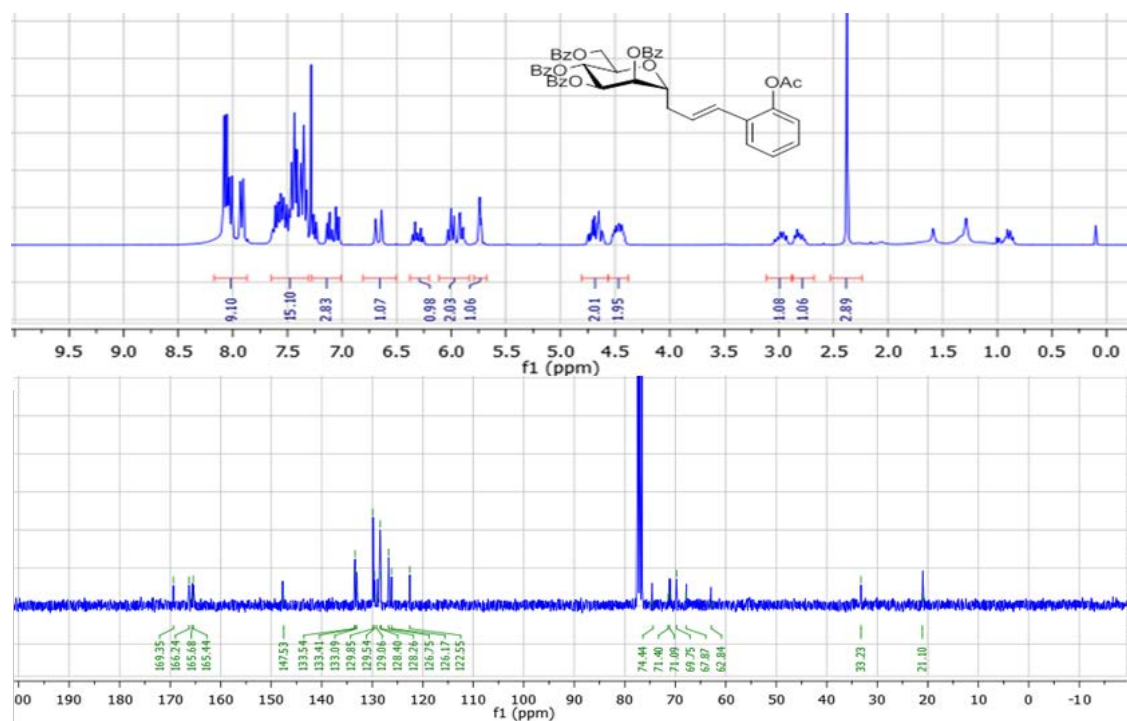

Figure S8. <sup>1</sup>H NMR and <sup>13</sup>C NMR of compound 4 (CDCl<sub>3</sub>, 300 and 75 MHz respectively)

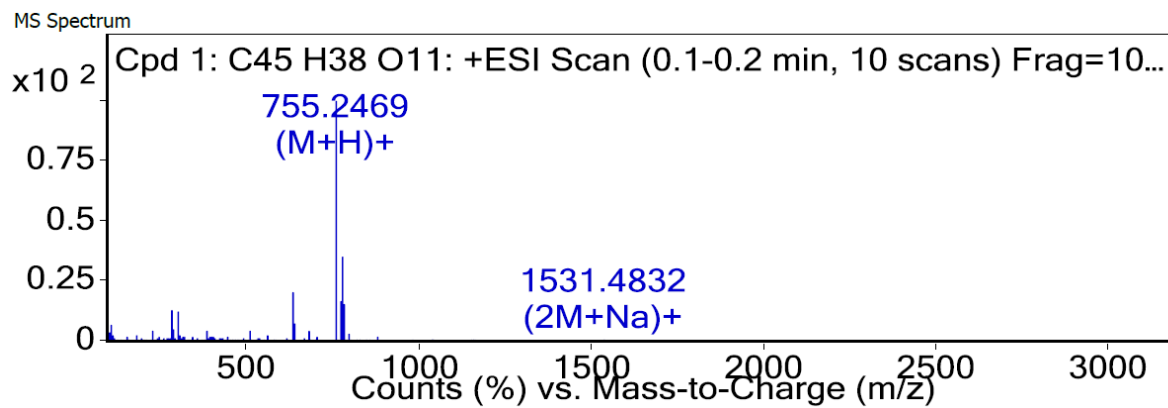

Figure S9. ESI+-HRMS spectrum of compound 4

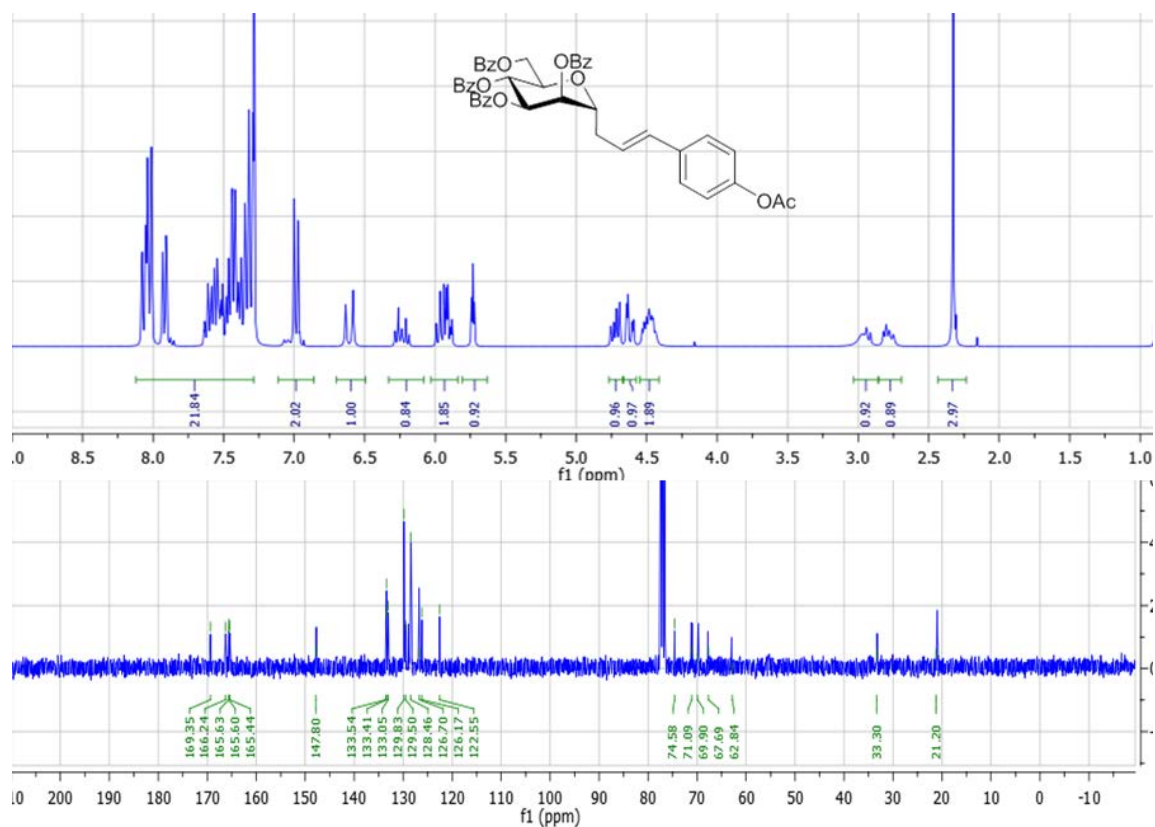

**Figure S10.** <sup>1</sup>H NMR and <sup>13</sup>C NMR of compound 5 (CDCl<sub>3</sub>, 300 and 75 MHz respectively)

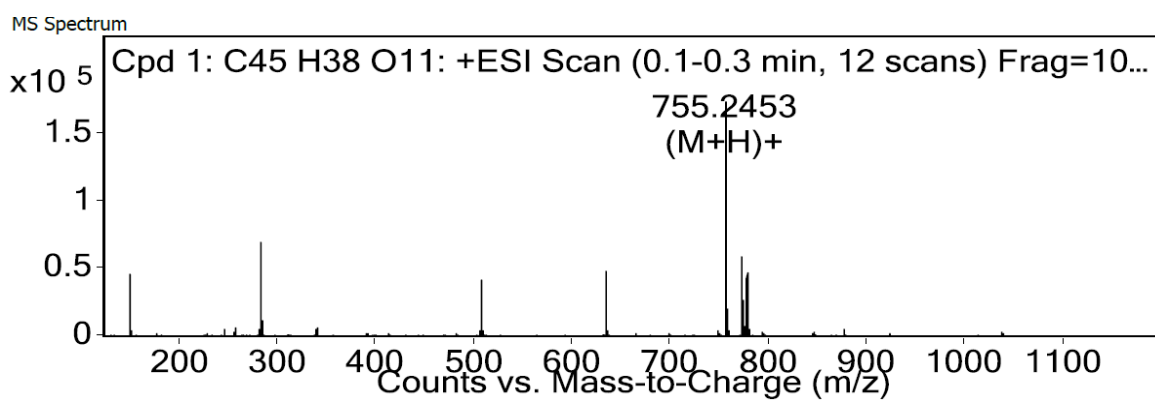

**Figure S11.** ESI+-HRMS spectrum of compound 5

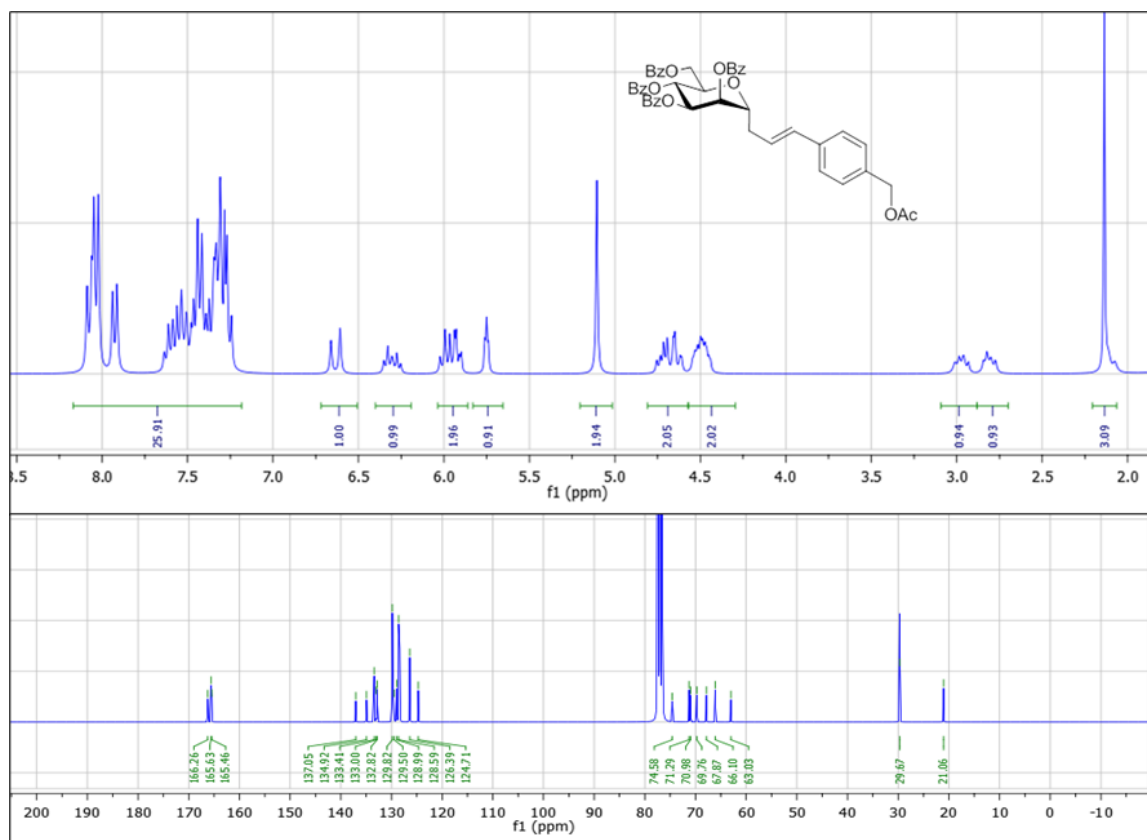

Figure S12. <sup>1</sup>H NMR and <sup>13</sup>C NMR of compound 6 (CDCl<sub>3</sub>, 300 and 75 MHz respectively)

MS Zoomed Spectrum

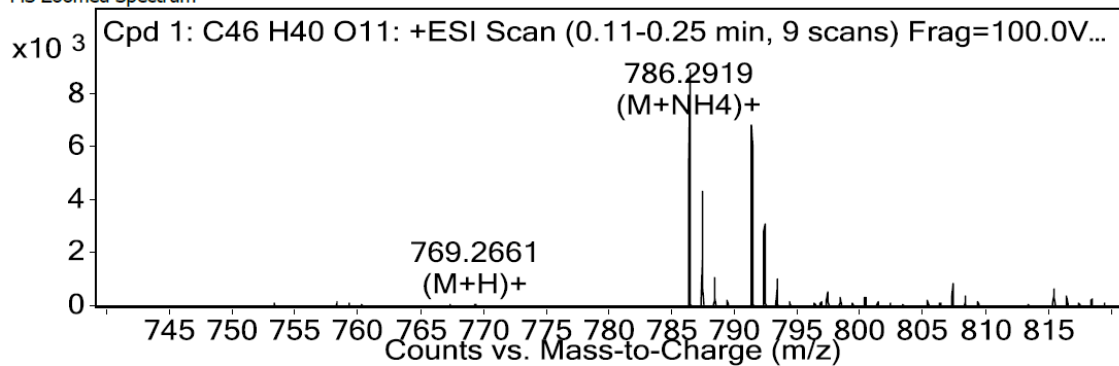

Figure S13. ESI<sup>+</sup>-HRMS spectrum of compound 6

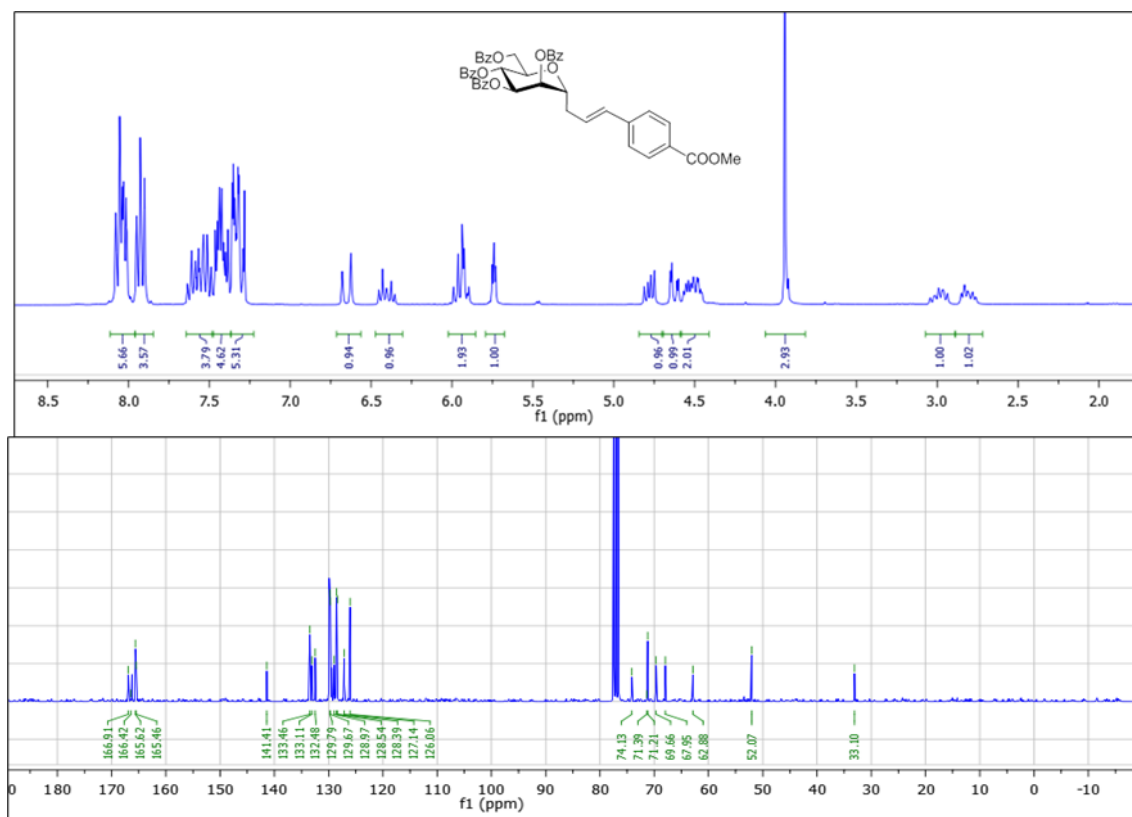

Figure S14. <sup>1</sup>H NMR and <sup>13</sup>C NMR of compound 7 (CDCl<sub>3</sub>, 300 and 75 MHz respectively)

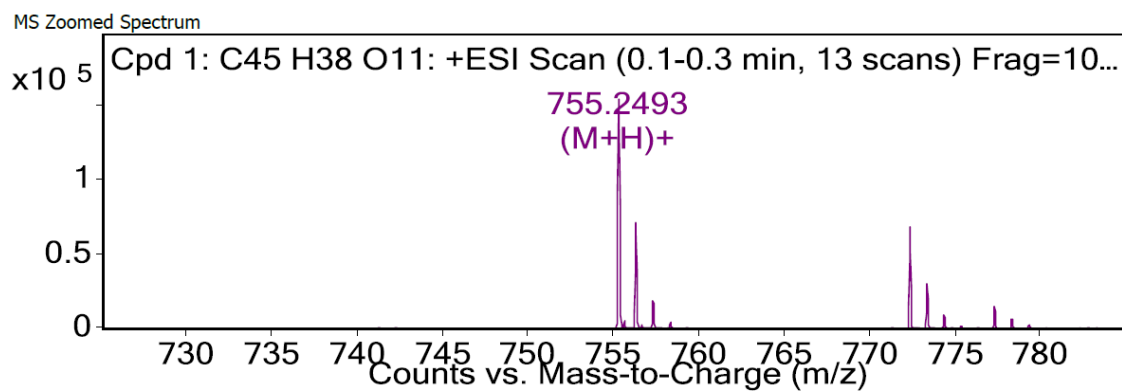

Figure S15. ESI+-HRMS spectrum of compound 7



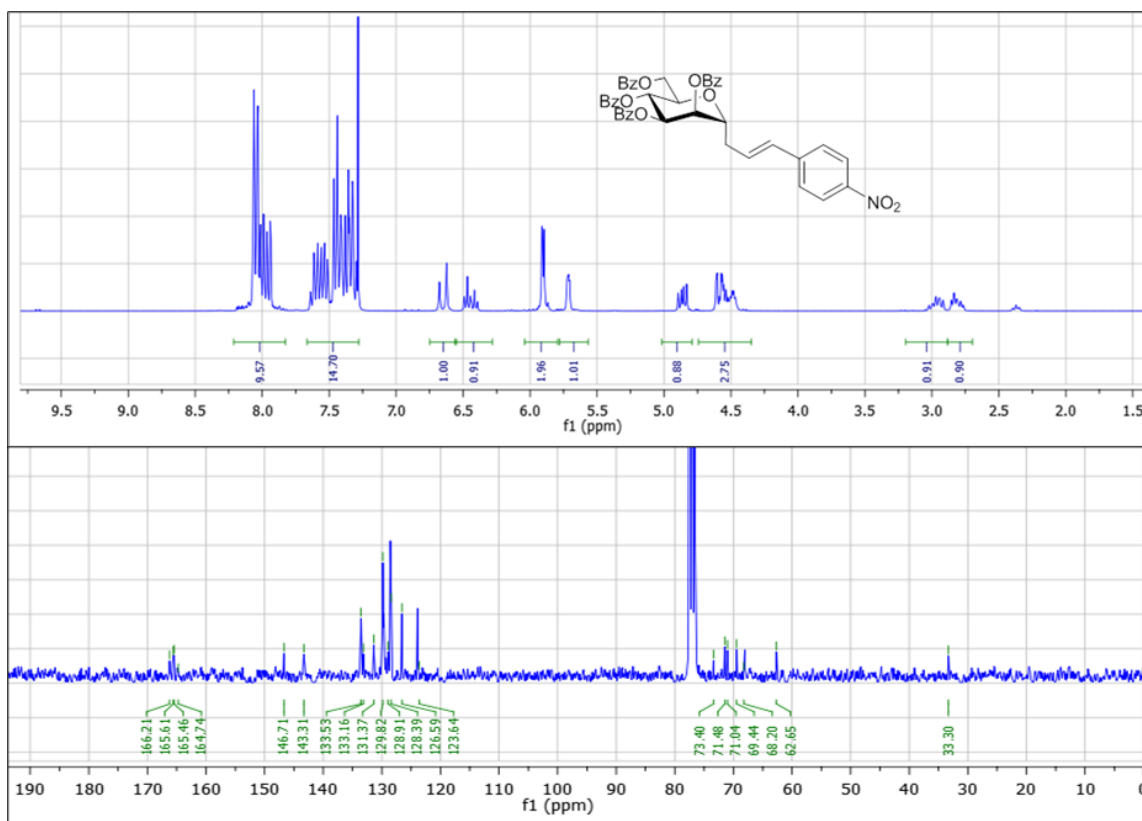

Figure S16. <sup>1</sup>H NMR and <sup>13</sup>C NMR of compound 8 (CDCl<sub>3</sub>, 300 and 75 MHz respectively)

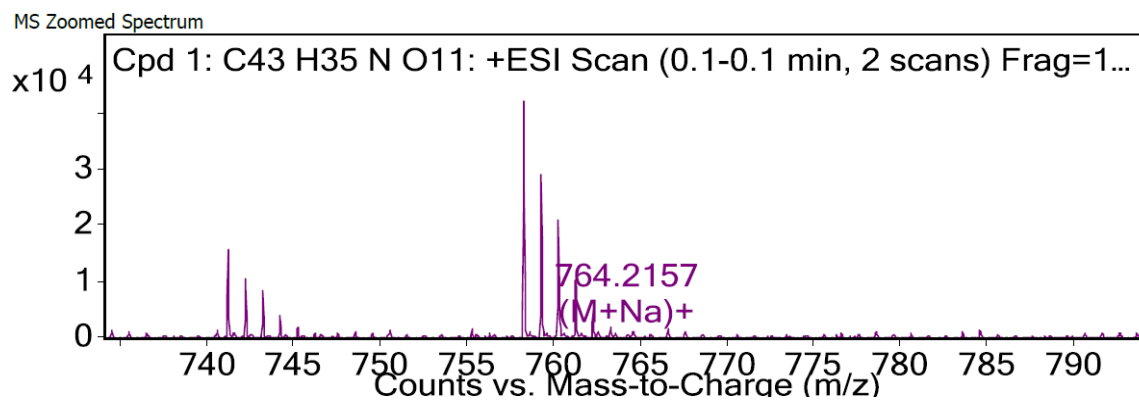

Figure S17. ESI+-HRMS spectrum of compound 8

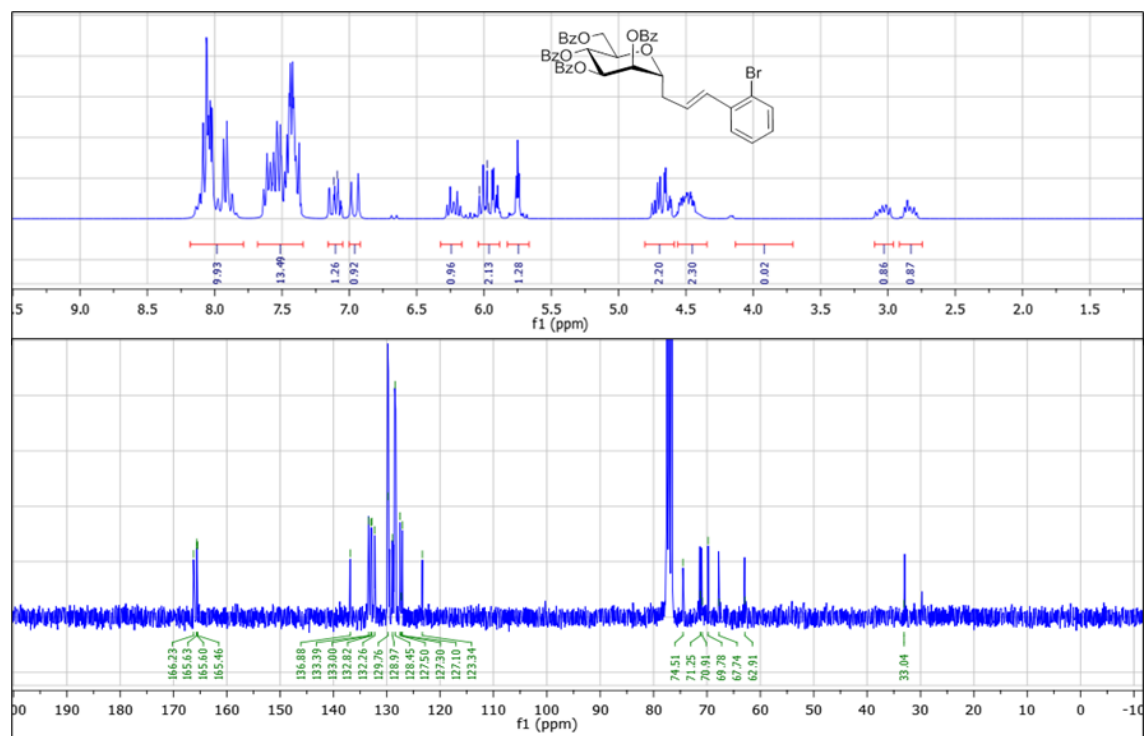

Figure S18. <sup>1</sup>H NMR and <sup>13</sup>C NMR of compound 10 (CDCl<sub>3</sub>, 300 and 75 MHz respectively)

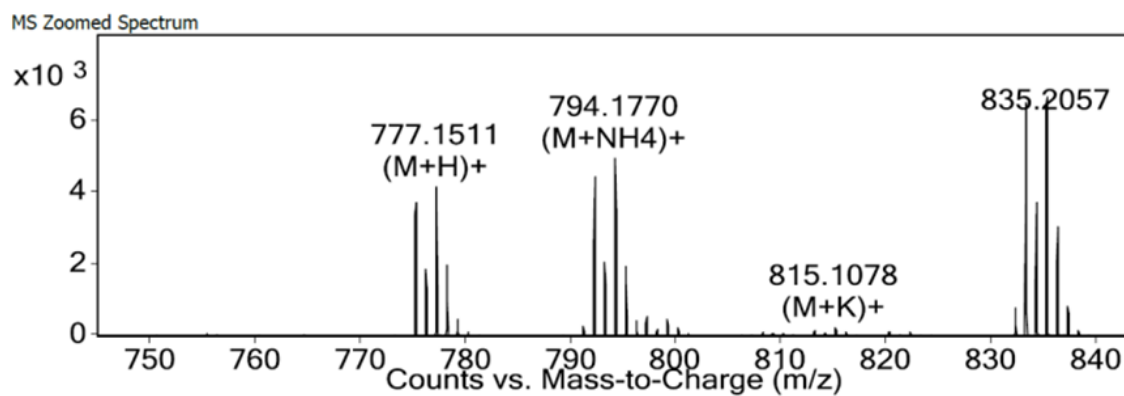

Figure S19. ESI+-HRMS spectrum of compound 10

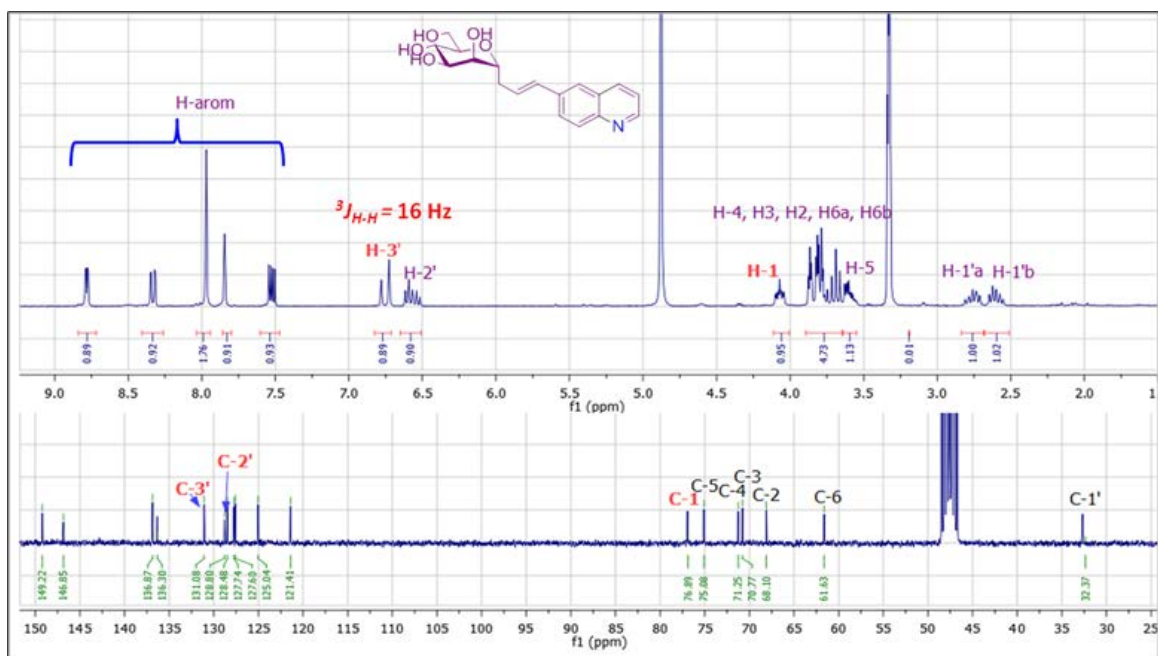

**Figure S20.** Fully assigned <sup>1</sup>H NMR and <sup>13</sup>C NMR of compound 11 (CD<sub>3</sub>OD, 600 and 151 MHz respectively)

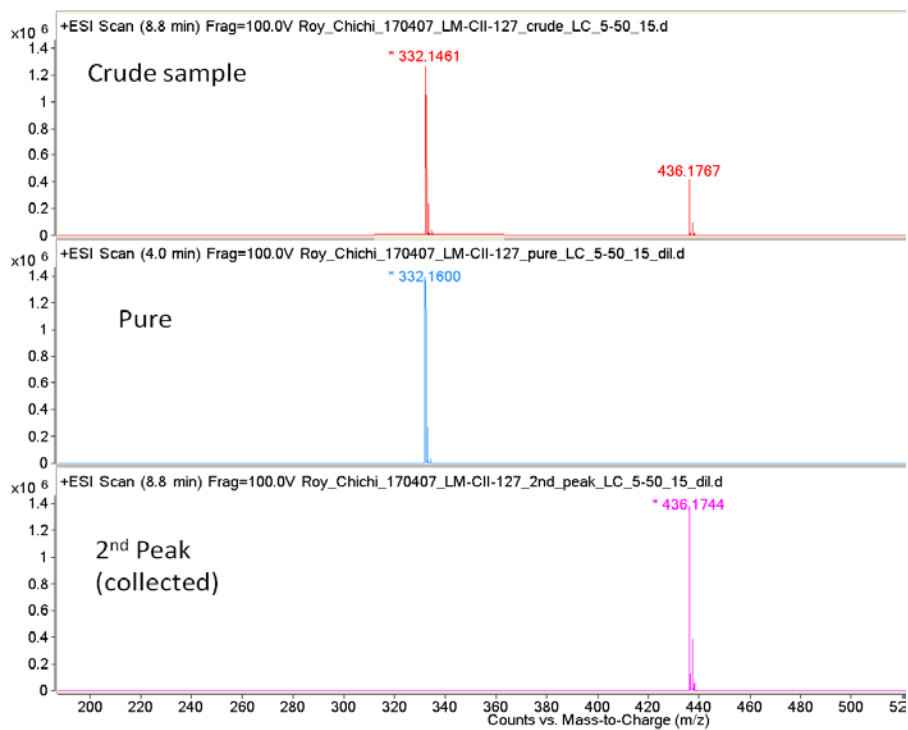

**Figure S21.** HPLC-TOF-MAS analysis spectrum of compound 11

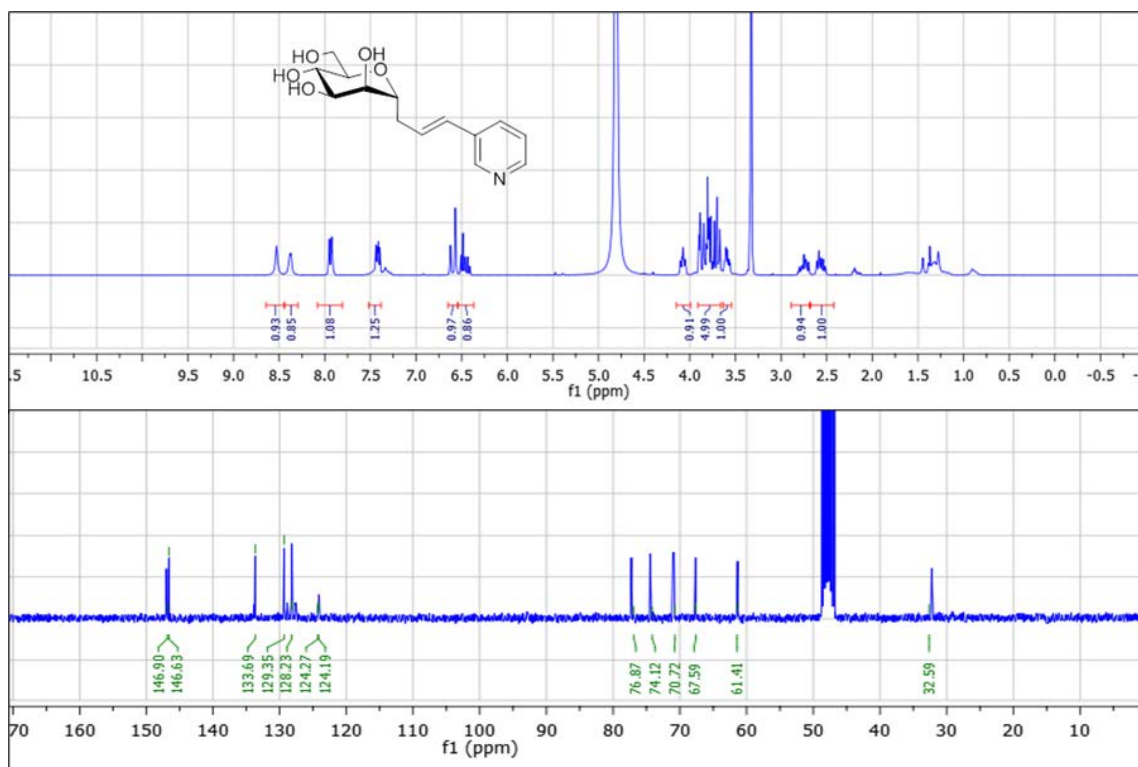

**Figure S22.** <sup>1</sup>H NMR and <sup>13</sup>C NMR spectrum of compound 12 (CD<sub>3</sub>OD, 300 and 75MHz respectively)

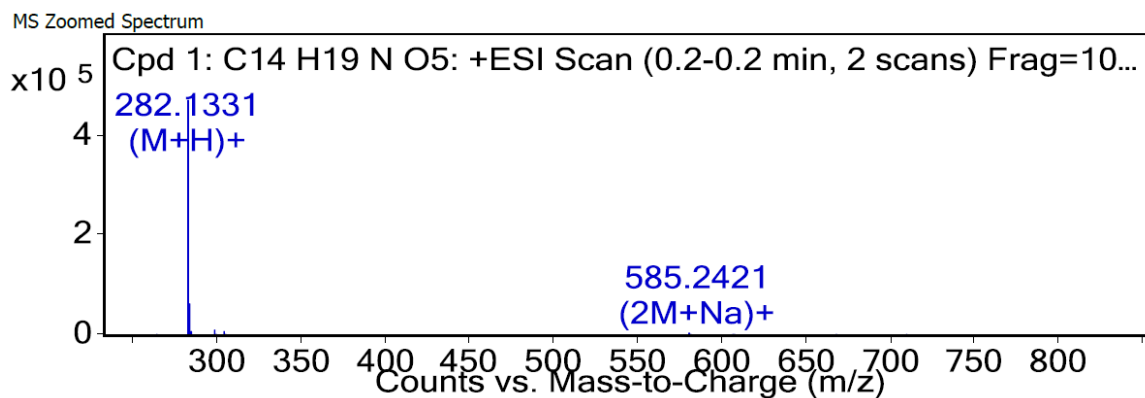

**Figure S23.** ESI+-HRMS spectrum of compound 12

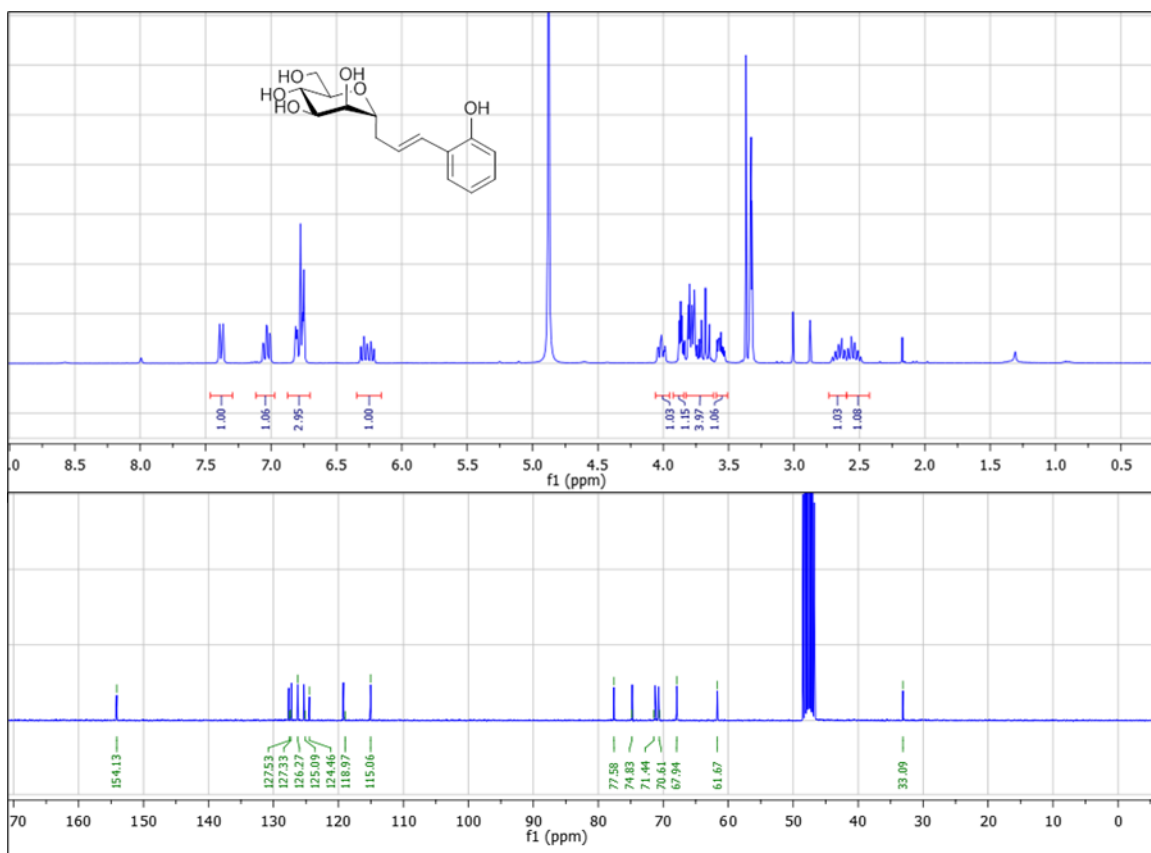

Figure S24. <sup>1</sup>H NMR and <sup>13</sup>C NMR spectrum of compound 13 (CD<sub>3</sub>OD, 300 and 75 MHz respectively)

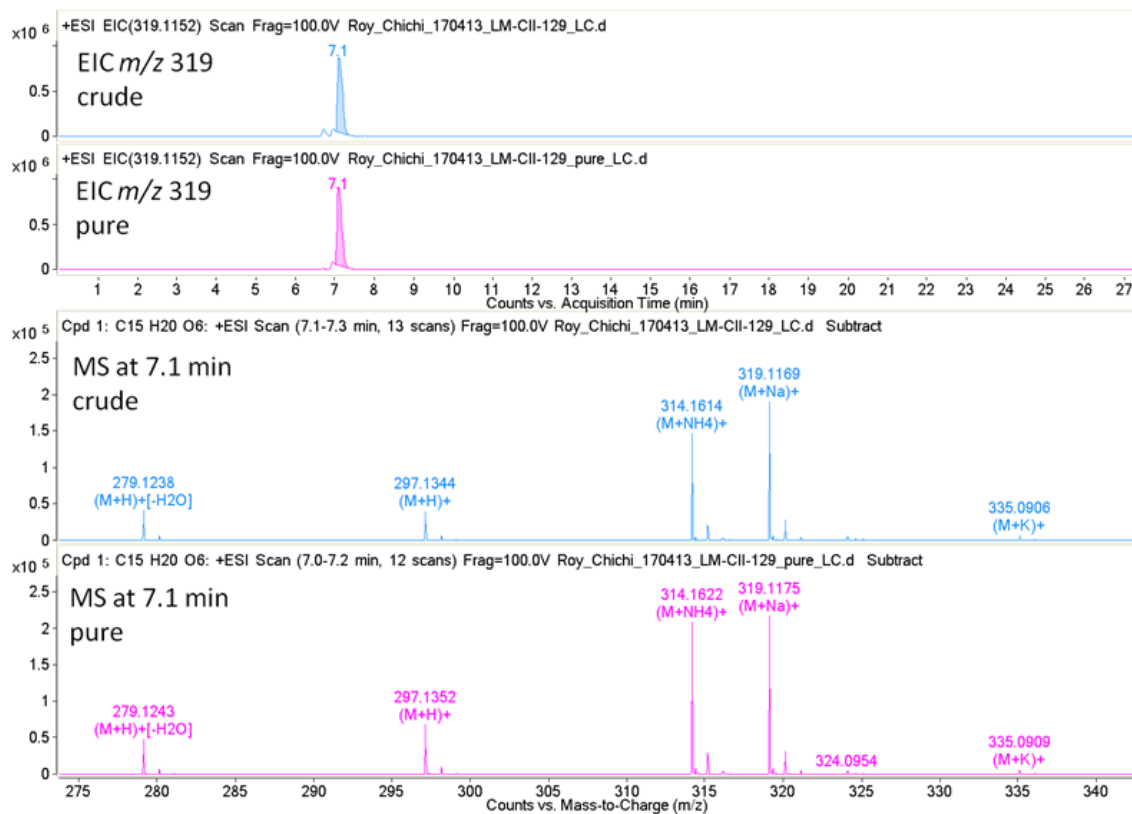

Figure S25. HPLC-TOF-MAS analysis spectrum of compound 13

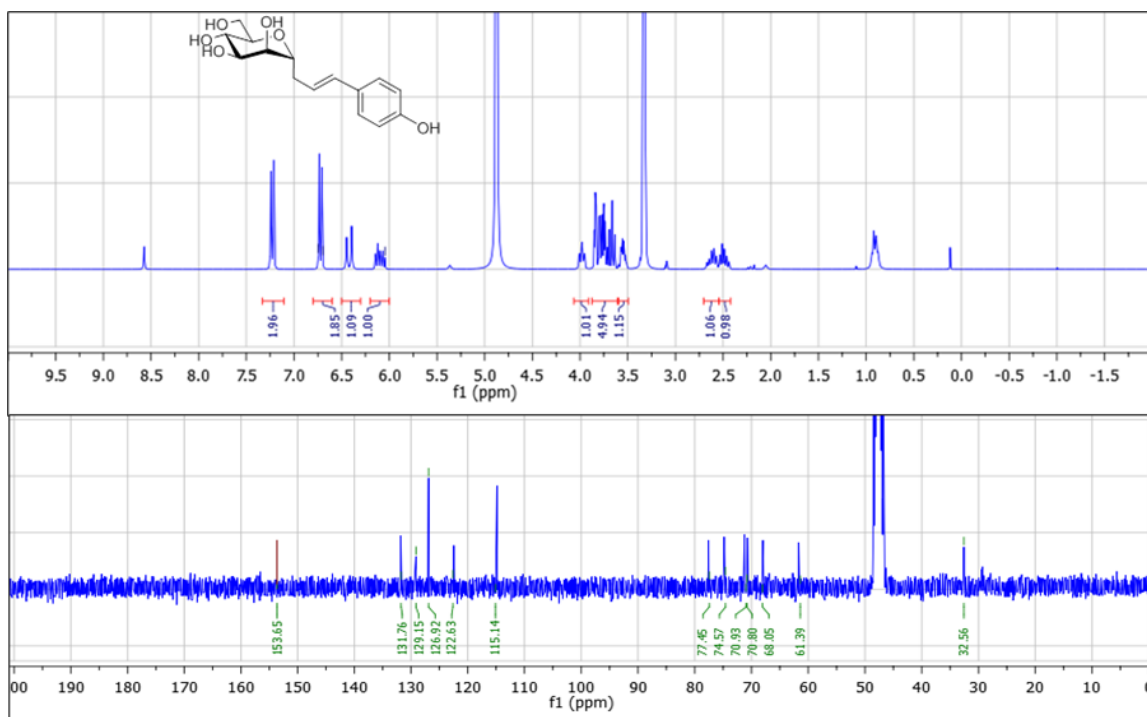

**Figure S26.**  $^1\text{H}$  NMR and  $^{13}\text{C}$  NMR spectrum of compound 14 ( $\text{CD}_3\text{OD}$ , 300 and 75MHz respectively)

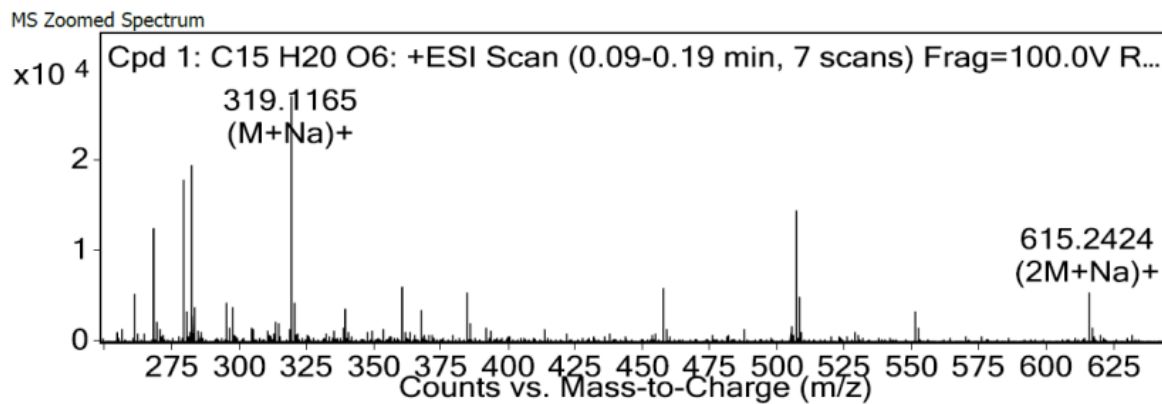

**Figure S27.** ESI+-HRMS spectrum of compound 14

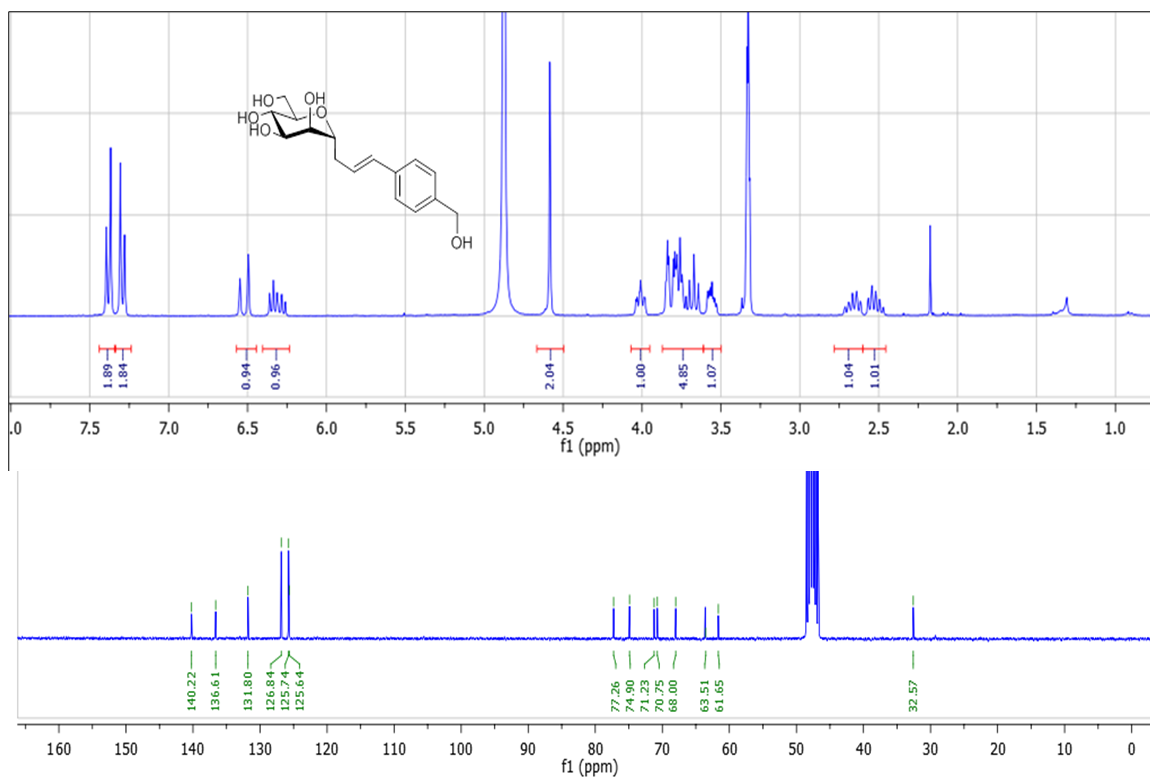

Figure S28. <sup>1</sup>H NMR and <sup>13</sup>CNMR spectrum of compound 15 (CD<sub>3</sub>OD, 300 and 75MHz respectively

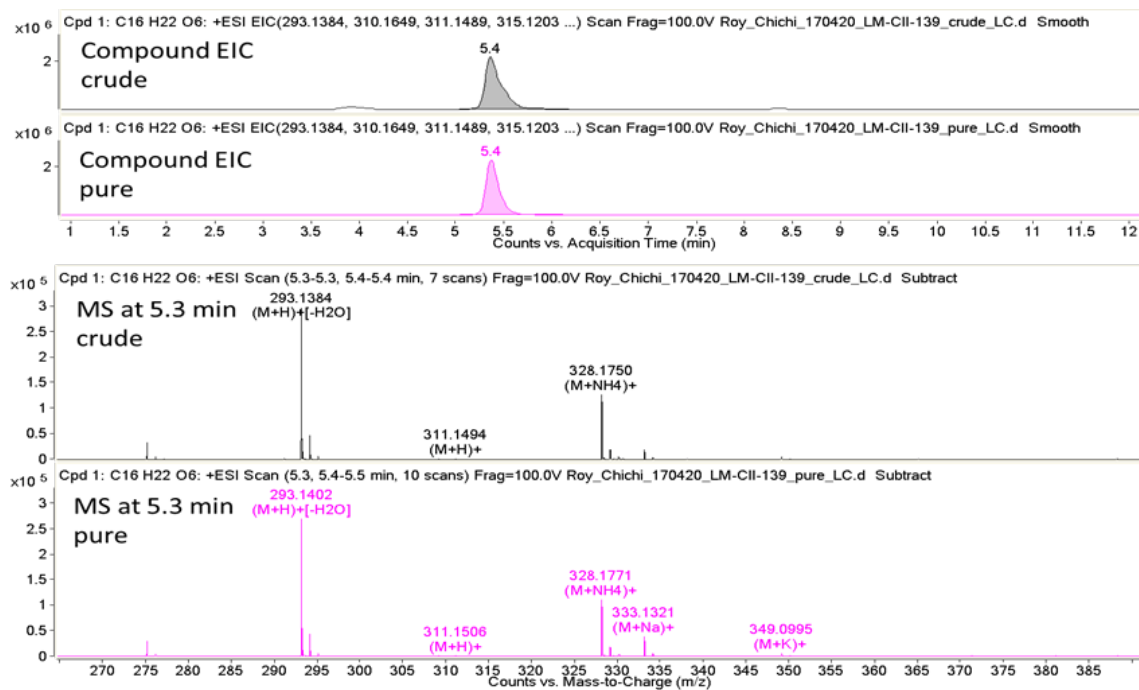

Figure S29. HPLC-TOF-MAS analysis spectrum of compound 15

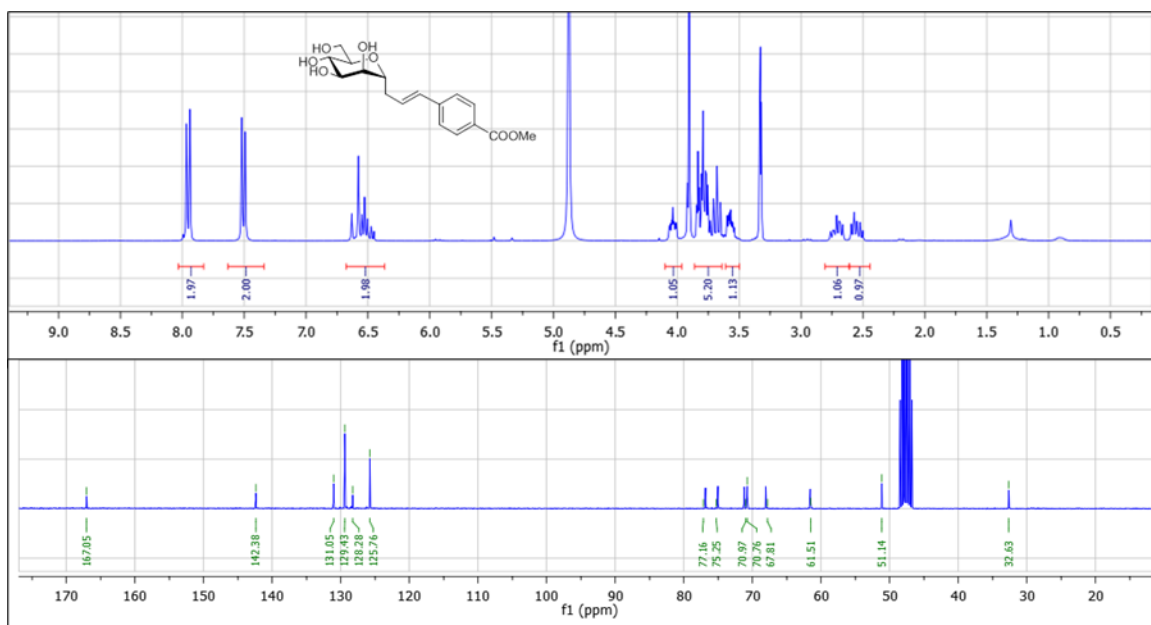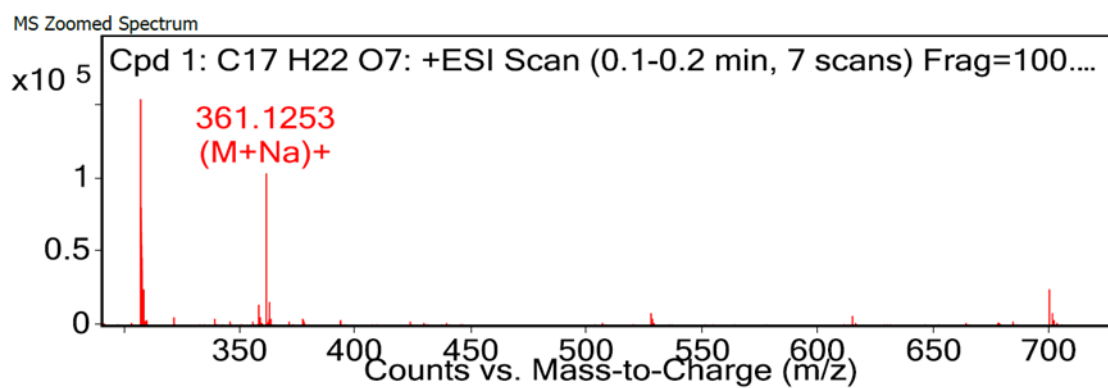

**Figure S31.** ESI+-HRMS spectrum of compound 16



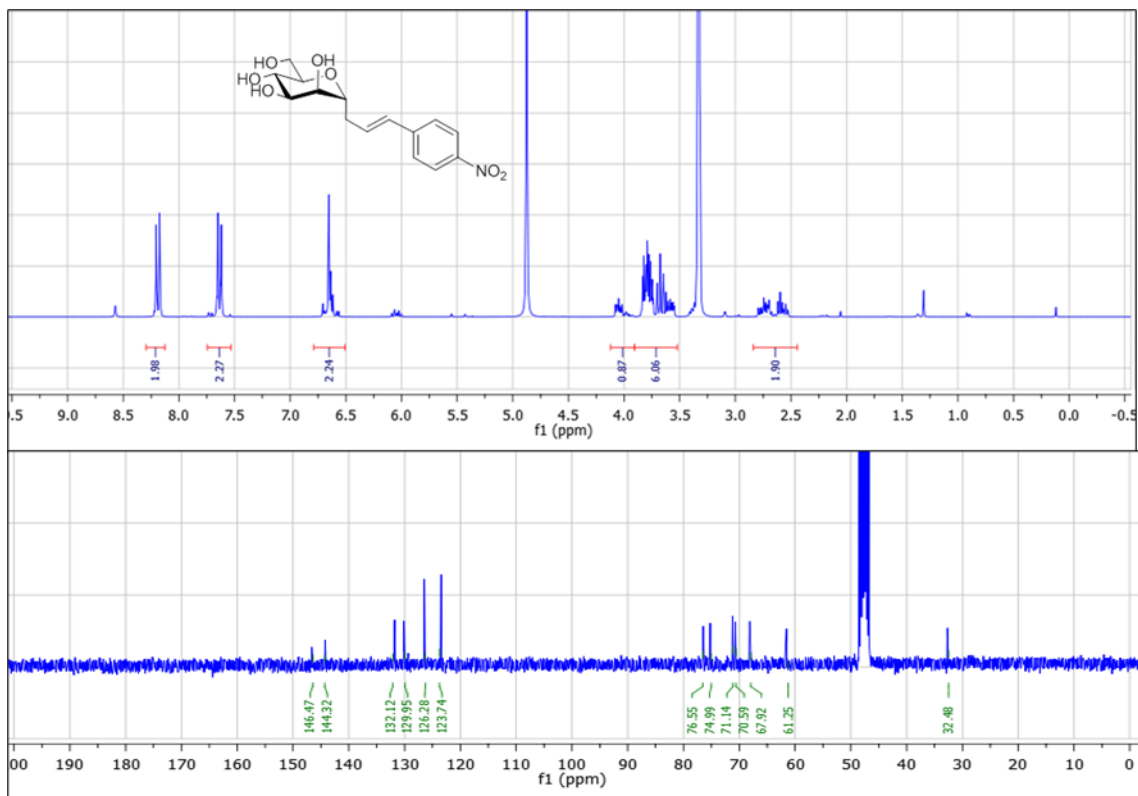

**Figure S32.** <sup>1</sup>H NMR and <sup>13</sup>C NMR spectrum of compound 17 (CD<sub>3</sub>OD, 300 and 75MHz respectively)

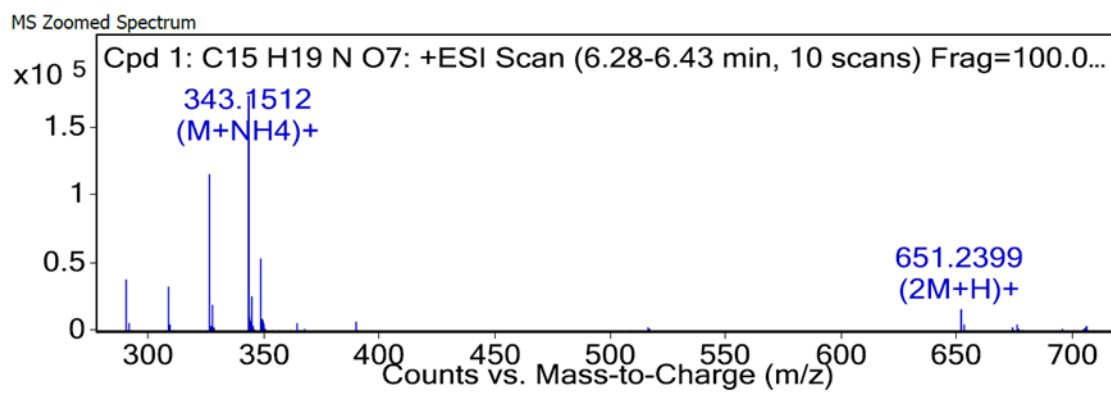

**Figure S33.** ESI+-HRMS spectrum of compound 17

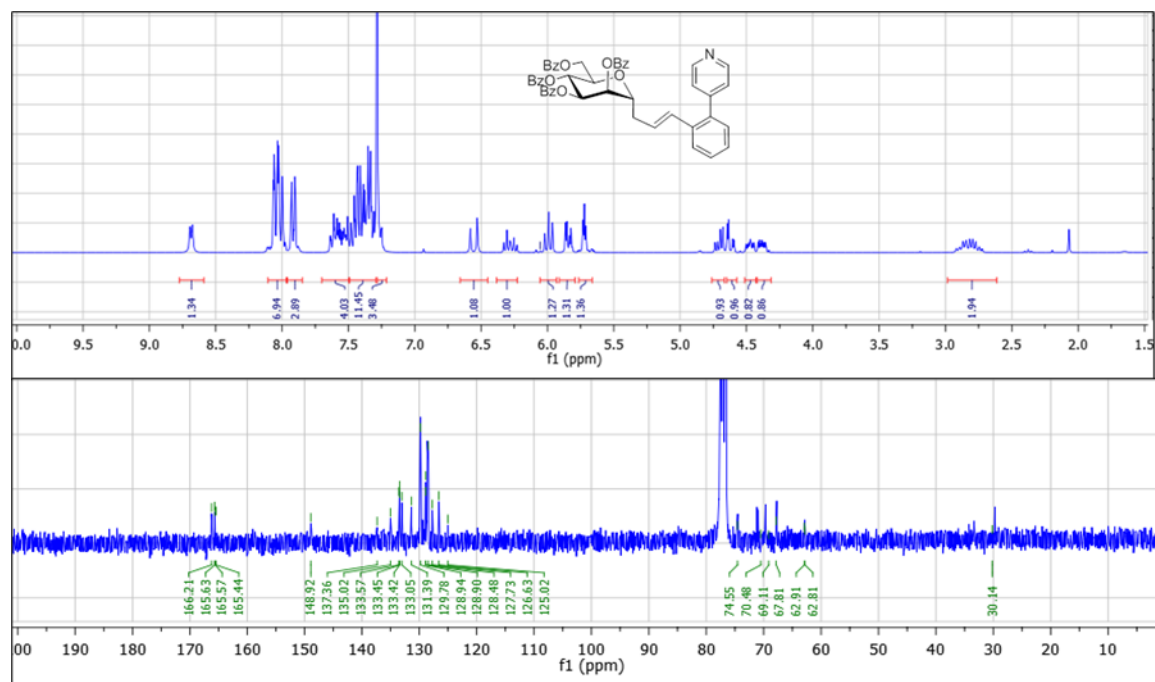

Figure S34. <sup>1</sup>H NMR and <sup>13</sup>C NMR spectrum of compound 19 (CD<sub>3</sub>OD, 300 and 75MHz respectively)

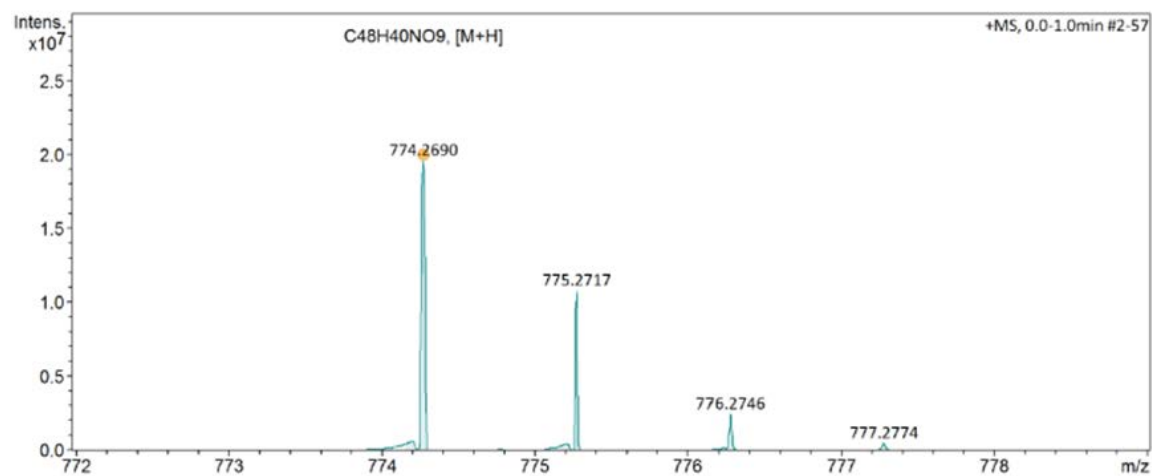

Figure S35. ESI+-HRMS spectrum of compound 19

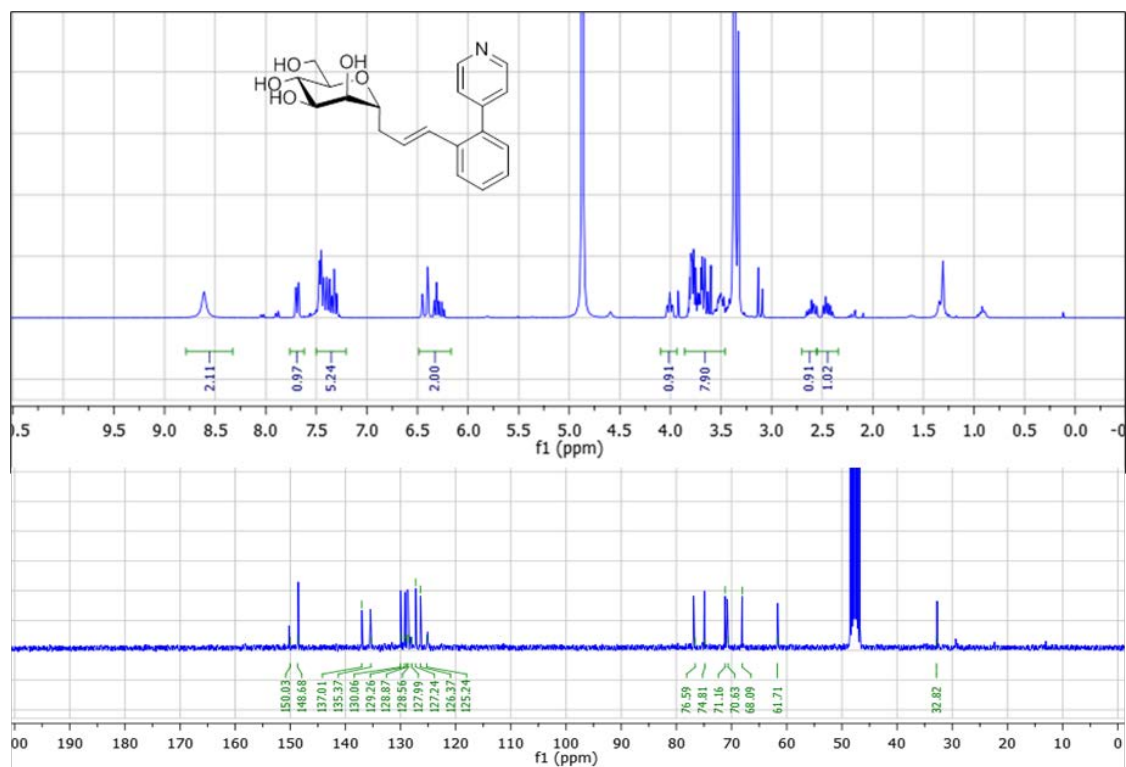

Figure S36. <sup>1</sup>H NMR and <sup>13</sup>C NMR spectrum of compound 20 (CD<sub>3</sub>OD, 300 and 75MHz respectively)

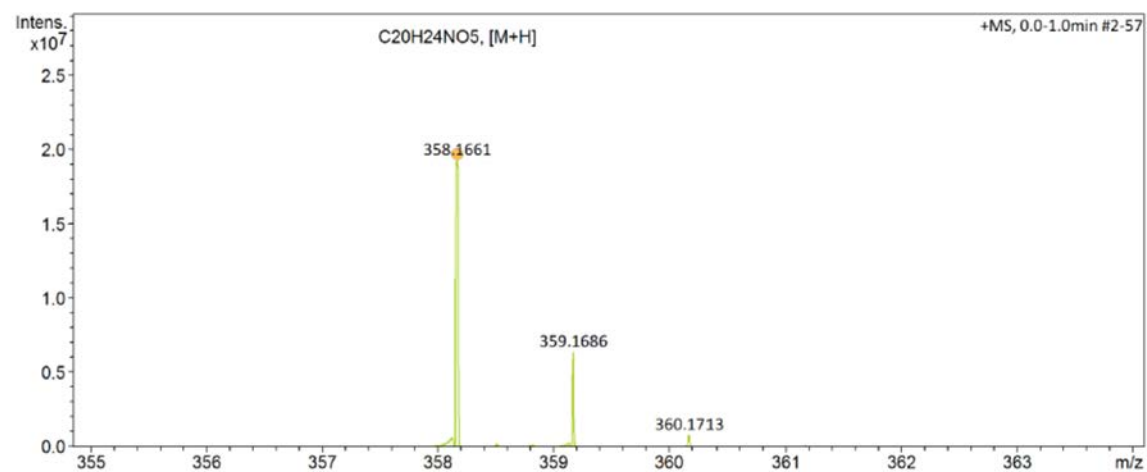

Figure S37. ESI+-HRMS spectrum of compound 20

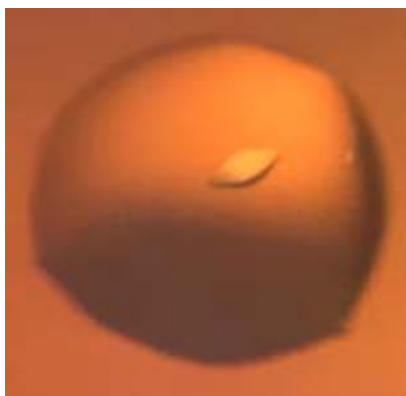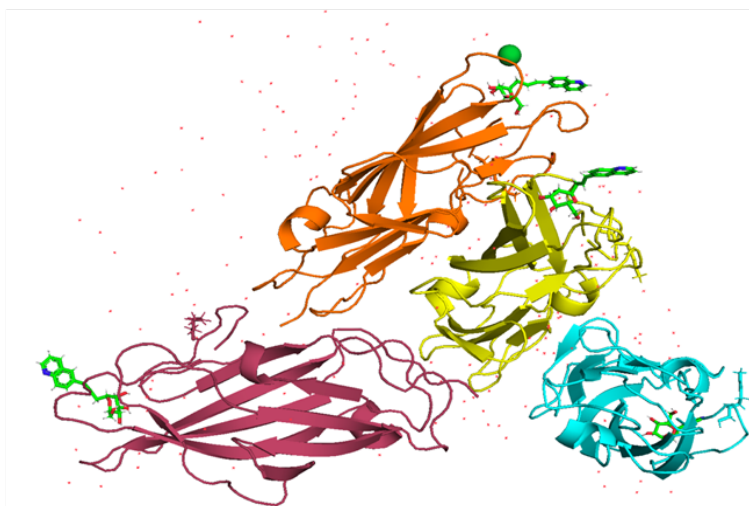

**Figure S38.** Single crystal of FimH bound with ligand 11

Table S1. X-ray data collection and refinement statistics.

|                                                        | <b>FimH – (cpd 11)</b>                                                                  |
|--------------------------------------------------------|-----------------------------------------------------------------------------------------|
| <b>PDB entry code</b>                                  | 8BVD                                                                                    |
| <b>Resolution range*</b>                               | 49.73 – 3.00 (3.18 - 3.00)                                                              |
| <b>Space group</b>                                     | P 61 2 2                                                                                |
| <b>Unit cell constants</b>                             | a, b = 151.784 Å, c = 225.034 Å<br>$\alpha, \beta = 90.00^\circ, \gamma = 120.00^\circ$ |
| <b>Total number of reflections</b>                     | 1224300 (196951)                                                                        |
| <b>Number of unique reflections</b>                    | 31057 (4900)                                                                            |
| <b>Multiplicity</b>                                    | 39.4 (40.2)                                                                             |
| <b>Completeness (%)</b>                                | 98.6 (98.3)                                                                             |
| <b>&lt; I/sigma(I) &gt;</b>                            | 12.41 (1.37)                                                                            |
| <b>Wilson B-factor (Å<sup>2</sup>)</b>                 | 46.9                                                                                    |
| <b>R-meas.</b>                                         | 0.464 (3.422)                                                                           |
| <b>CC1/2</b>                                           | 0.996 (0.615)                                                                           |
| <b>Resolution range* for refinement</b>                | (131.45 – 3.00)                                                                         |
| <b>Number of reflections used in refinement</b>        | 27492 (34)                                                                              |
| <b>Reflections used for R-free</b>                     | 1439 (768)                                                                              |
| <b>R-work</b>                                          | 0.2526 (0.301)                                                                          |
| <b>R-free</b>                                          | 0.2906 (0.344)                                                                          |
| <b>Coordinate error (Å) (maximum-likelihood based)</b> | 0.328                                                                                   |
| <b>Protein residues</b>                                | 632                                                                                     |
| <b>RMS (bonds)</b>                                     | 0.011                                                                                   |
| <b>RMS (angles)</b>                                    | 1.668                                                                                   |
| <b>Ramachandran favoured (%)</b>                       | 95.03                                                                                   |
| <b>Ramachandran allowed (%)</b>                        | 5.81                                                                                    |
| <b>Ramachandran outliers (%)</b>                       | 0.16                                                                                    |
| <b>Rotamer outliers (%)</b>                            | 0.20                                                                                    |
| <b>Clash score</b>                                     | 11.84                                                                                   |
| <b>Average B-factor (Å<sup>2</sup>)</b>                | 53.00                                                                                   |
| <b>macromolecules</b>                                  | 51.0                                                                                    |
| <b>ligands</b>                                         | 36.5                                                                                    |
|                                                        |                                                                                         |

\* Statistics for the highest-resolution shell are shown between parentheses.

|   | MeaDMan (23) |   |        |   | PNPMan (22) |   |       |   | HM (21) |    |                    |    | all values<br>nM |
|---|--------------|---|--------|---|-------------|---|-------|---|---------|----|--------------------|----|------------------|
|   | 1            | 2 | 3      | 4 | 5           | 6 | 7     | 8 | 9       | 10 | 11                 | 12 |                  |
| A | 200000       |   | 781.25 |   | 20000       |   | 78.13 |   | 2000    |    | 7.81               |    |                  |
| B | 100000       |   | 390.63 |   | 10000       |   | 39.06 |   | 1000    |    | 3.91               |    |                  |
| C | 50000        |   | 195.31 |   | 5000        |   | 19.53 |   | 500     |    | 1.95               |    |                  |
| D | 25000        |   | 97.66  |   | 2500        |   | 9.77  |   | 250     |    | 0.98               |    |                  |
| E | 12500        |   | 48.83  |   | 1250        |   | 4.88  |   | 125     |    | 0.49               |    |                  |
| F | 6250         |   | 24.41  |   | 625         |   | 2.44  |   | 62.5    |    | 0.24               |    |                  |
| G | 3125         |   | 12.21  |   | 312.5       |   | 1.22  |   | 31.25   |    | PBS + FimH traceur |    |                  |
| H | 1562.5       |   | 6.10   |   | 156.25      |   | 0.61  |   | 15.63   |    | PBS seul           |    |                  |

|   | Inhibitor 11 |   |        |   | Inhibitor 20 |   |       |   | Inhibitor 18 |    |                    |    |
|---|--------------|---|--------|---|--------------|---|-------|---|--------------|----|--------------------|----|
|   | 1            | 2 | 3      | 4 | 5            | 6 | 7     | 8 | 9            | 10 | 11                 | 12 |
| A | 614,2        |   | 2,4    |   | 581,63       |   | 2.27  |   | 3481.6       |    | 13.6               |    |
| B | 307,2        |   | 1,2    |   | 290.82       |   | 1,14  |   | 1740.8       |    | 6.8                |    |
| C | 153,6        |   | 0,6    |   | 145.41       |   | 0.57  |   | 870.4        |    | 3.4                |    |
| D | 76,8         |   | 0,3    |   | 72.70        |   | 0.28  |   | 435.2        |    | 1.7                |    |
| E | 38,4         |   | 0,15   |   | 36.35        |   | 0.14  |   | 217.6        |    | 0.85               |    |
| F | 19,2         |   | 0,075  |   | 18.18        |   | 0.07  |   | 108.8        |    | 0,43               |    |
| G | 9,6          |   | 0,0375 |   | 9.09         |   | 0.035 |   | 54.4         |    | PBS + FimH traceur |    |
| H | 4,8          |   | 0,0188 |   | 4.54         |   | 0,018 |   | 27.2         |    | PBS seul           |    |

**Figure S39.** A perform serial dilution of fimH with ligands
